# Supplementary material for: Highly plastic genome of Microcystis aeruginosa PCC 7806, a ubiquitous toxic freshwater cyanobacterium
Source: PubMed Central journal article supplement (PMC2442094; doi:10.1186/1471-2164-9-274), 2008-06-05
Supplement: 1471-2164-9-274-S3.pdf [file 1471-2164-9-274-S3.pdf]

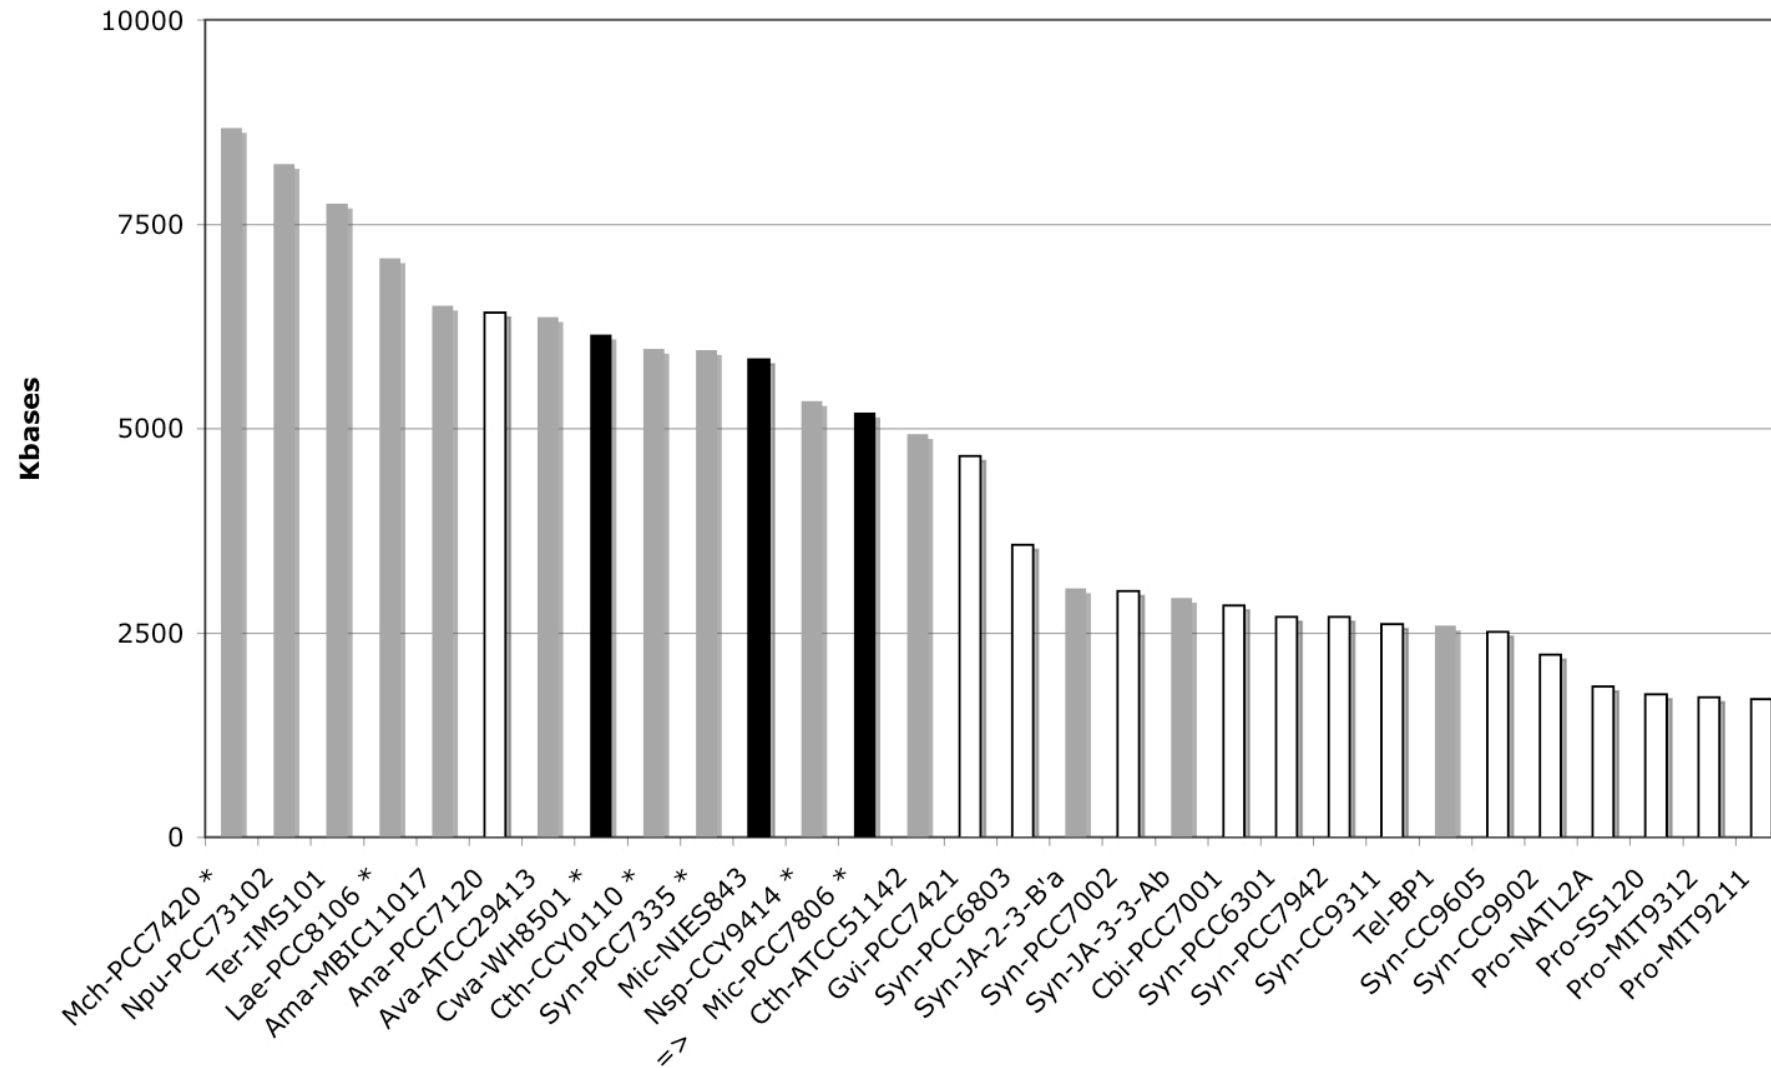

**Additional file 3:** Representation of the total length of cyanobacterial genomes. The filling of the histogram bars indicates the percentage of DNA repeated sequences in each genome as defined in Figure 2 (Black: >10%; grey: >1%; white: ≤1%). See the Methods section for the strain identifiers.
