# Supplementary material for: Highly plastic genome of Microcystis aeruginosa PCC 7806, a ubiquitous toxic freshwater cyanobacterium
Source: PubMed Central journal article supplement (PMC2442094; doi:10.1186/1471-2164-9-274), 2008-06-05
Supplement: 1471-2164-9-274-S4.pdf [file 1471-2164-9-274-S4.pdf]

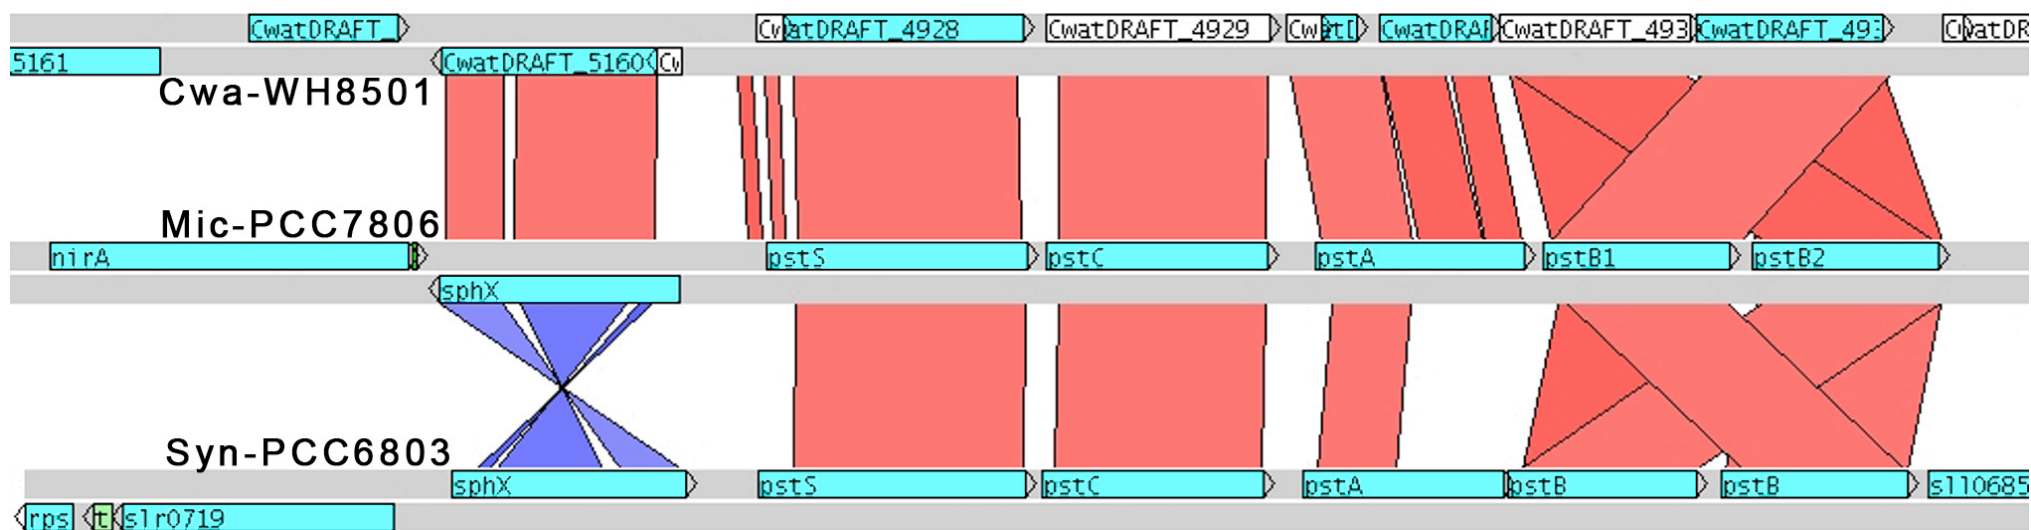

**Additional file 4:** Schematic representation of the phosphate transport gene cluster conserved in Mic-PCC7806, Cwa-WH8501 and Syn-PCC6803 (based on an output of ACT software; [www.sanger.ac.uk/Software/ACT](http://www.sanger.ac.uk/Software/ACT)). See the Methods section for the strain identifiers.
