# Supplementary material for: Highly plastic genome of Microcystis aeruginosa PCC 7806, a ubiquitous toxic freshwater cyanobacterium
Source: PubMed Central journal article supplement (PMC2442094; doi:10.1186/1471-2164-9-274), 2008-06-05
Supplement: 1471-2164-9-274-S6.pdf [file 1471-2164-9-274-S6.pdf]

**Additional file 6****Putative restriction endonucleases in the genome of *Microcystis aeruginosa* PCC 7806**

| Gene ID        | COG number     | Function                                                                                           |
|----------------|----------------|----------------------------------------------------------------------------------------------------|
| mic0099        | COG3440        | Predicted restriction endonuclease                                                                 |
| mic0856        | COG1715        | Restriction endonuclease (Mrr restriction system protein)                                          |
| mic1049        | COG1403        | Restriction endonuclease HNH superfamily                                                           |
| <b>mic1233</b> |                | <b>Type II restriction enzyme (probable endonuclease <i>HindVP</i>)</b>                            |
| mic1522        | COG1403        | Restriction endonuclease HNH superfamily                                                           |
| mic1606        |                | Restriction endonuclease (possible <i>MspAII</i> )                                                 |
| <b>mic1612</b> |                | <b>Restriction endonuclease (possible endonuclease <i>MspAII</i>)</b>                              |
| <b>mic2809</b> |                | <b>Type II site-specific deoxyribonuclease (possible endonuclease <i>AvaI</i>)</b>                 |
| mic3268        | COG4096        | Type I/III site-specific restriction-modification system; restriction subunit and related helicase |
| mic3271        | COG0732        | Type I Restriction endonuclease; HsdS subunit                                                      |
| mic3701        | COG4096        | Type I/III site-specific restriction-modification system; restriction subunit and related helicase |
| <b>mic3705</b> | <b>COG0732</b> | <b>Type I Restriction endonuclease; HsdS subunit</b>                                               |
| mic3707        |                | Type I restriction enzyme M protein                                                                |
| mic3969        | COG0732        | Type I site-specific deoxyribonuclease                                                             |
| mic3993        |                | Type III Restriction endonuclease; restriction subunit                                             |
| mic4233        |                | Type I restriction enzyme; HsdR restriction subunit                                                |
| <b>mic4262</b> |                | <b>Type II restriction endonuclease (possible endonuclease <i>EcoRV</i>)</b>                       |
| <b>mic4389</b> |                | <b>Type II restriction endonuclease</b>                                                            |
| mic4421        | COG1403        | Restriction endonuclease HNH superfamily                                                           |
| <b>mic5299</b> |                | <b>Type II restriction enzyme (probable endonuclease <i>NspV</i>)</b>                              |
| mic6570        |                | Type I Restriction endonuclease; HsdS subunit                                                      |

Enzymes shown in bold are co-localized with putative methylases shown in the table of additional file 7.
