# Supplementary material for: Highly plastic genome of Microcystis aeruginosa PCC 7806, a ubiquitous toxic freshwater cyanobacterium
Source: PubMed Central journal article supplement (PMC2442094; doi:10.1186/1471-2164-9-274), 2008-06-05
Supplement: 1471-2164-9-274-S7.pdf [file 1471-2164-9-274-S7.pdf]

**Additional file 7**

**Putative methylases/methyltransferases in the genome of *Microcystis aeruginosa* PCC 7806**

| Gene ID        | COG number     | Function                                                                                     | Gene ID        | COG number     | Function                                                                           |
|----------------|----------------|----------------------------------------------------------------------------------------------|----------------|----------------|------------------------------------------------------------------------------------|
| mic0260        | COG0270        | Site-specific DNA methylase (putative <i>Eco47II</i> , <i>Sau96I</i> modification methylase) | mic3149        | COG0863        | DNA modification methylase (putative <i>CfrBI</i> modification methylase)          |
| mic0262        | COG0863        | DNA modification methylase                                                                   | mic3329        | COG1092        | Predicted SAM-dependent methyltransferase                                          |
| mic0319        |                | SAM-dependent methyltransferase                                                              | mic3380        | COG1743        | Adenine-specific DNA methylase containing a Zn-ribbon                              |
| mic0367        |                | SAM-dependent methyltransferase                                                              | mic3417        | COG2189        | Adenine specific DNA methylase (Putative type II DNA modification enzyme)          |
| mic0434        | COG4889        | Adenine specific DNA methyltransferase                                                       | mic3467        | COG1002        | Type II restriction enzyme, methylase subunit                                      |
| mic0510        |                | SAM-dependent methyltransferase                                                              | mic3571        | COG0116        | Predicted N6-adenine-specific DNA methylase                                        |
| mic0553        |                | SAM-dependent methyltransferase                                                              | <b>mic3707</b> | COG0286        | <b>Type I restriction-modification system methyltransferase subunit</b>            |
| mic0555        |                | SAM-dependent methyltransferase                                                              | mic3729        | COG0220        | Predicted SAM-dependent methyltransferase                                          |
| mic0714        | COG0286        | Type I restriction-modification system methyltransferase subunit                             | mic3737        |                | SAM-dependent methyltransferase                                                    |
| mic0757        |                | SAM-dependent methyltransferase                                                              | mic3776        |                | Methyltransferase (putative <i>SsoI</i> methylase)                                 |
| mic0919        |                | Modification methylase (putative <i>EcoRV</i> methylase)                                     | mic3919        | COG0270        | Site-specific DNA methylase (putative type II <i>HaeII</i> modification methylase) |
| mic1132        |                | SAM-dependent methyltransferase                                                              | mic4082        | COG0863        | DNA modification methylase (putative <i>BstYI</i> methyltransferase)               |
| mic1135        |                | Predicted O-methyltransferase                                                                | mic4091        | COG1002        | Type II restriction enzyme, methylase subunit                                      |
| mic1145        | COG0286        | Type I restriction-modification system methyltransferase subunit                             | mic4194        |                | SAM-dependent methyltransferase                                                    |
| <b>mic1231</b> | <b>COG0270</b> | <b>Site-specific DNA methylase</b>                                                           | <b>mic4261</b> | <b>COG0338</b> | <b>Site-specific DNA methylase (putative <i>EcoRV</i> modification methylase)</b>  |
| mic1247        |                | SAM-dependent methyltransferase                                                              | mic4360        |                | SAM-dependent methyltransferase                                                    |
| mic1485        | COG0270        | Site-specific DNA methylase                                                                  | <b>mic4390</b> | <b>COG0270</b> | <b>Site-specific DNA methylase</b>                                                 |
| mic1536        | COG0270        | Site-specific DNA methylase                                                                  | mic4632        | COG0270        | Site-specific DNA methylase                                                        |
| <b>mic1611</b> | <b>COG0338</b> | <b>Site-specific DNA methylase (<i>MspAII</i> methyltransferase)</b>                         | mic4878        |                | SAM-dependent methyltransferase                                                    |
| mic1716        | COG0286        | Type I restriction-modification system methyltransferase subunit                             | mic4888        | COG1002        | Type II restriction enzyme, methylase subunit                                      |
| mic1905        |                | predicted N-6 adenine-specific DNA methylase                                                 | mic4913        | COG0286        | Type I restriction-modification system methyltransferase subunit                   |
| mic1963        | COG0313        | Predicted methyltransferase                                                                  | mic4976        |                | SAM-dependent methyltransferase                                                    |
| mic2077        |                | SAM-dependent methyltransferase                                                              | mic5066        | COG0270        | Site-specific DNA methylase (putative <i>HhaI</i> modification methylase)          |
| mic2080        |                | SAM-dependent methyltransferase                                                              | mic5070        | COG1002        | Type II restriction enzyme, methylase subunit                                      |
| mic2088        | COG1002        | Type II restriction enzyme, methylase subunit                                                | mic5255        |                | SAM-dependent methyltransferase                                                    |
| mic2201        | COG0270        | Site-specific DNA methylase                                                                  | <b>mic5298</b> |                | <b>Modification methylase (putative <i>NspV</i> methylase)</b>                     |
| mic2315        |                | Site-specific DNA methylase                                                                  | mic5314        |                | SAM-dependent methyltransferase                                                    |
| mic2318        | COG0863        | DNA modification methylase (putative <i>PvuII</i> modification methylase)                    | mic5330        |                | Type II restriction enzyme, methylase subunit                                      |
| mic2460        |                | SAM-dependent methyltransferase                                                              | mic5528        |                | N6-adenine-specific methylase                                                      |
| mic2464        | COG0863        | DNA modification methylase                                                                   | mic5612        |                | SAM-dependent methyltransferase                                                    |
| mic2569        |                | SAM-dependent methyltransferase                                                              | mic5613        | COG0338        | Site-specific DNA methylase                                                        |
| mic2593        | COG1002        | Type II restriction enzyme, methylase subunit                                                | mic5683        | COG0338        | Site-specific DNA methylase                                                        |
| <b>mic2808</b> | <b>COG0863</b> | <b>DNA modification methylase (putative <i>AvaI</i> modification methylase)</b>              | mic6590        | COG1002        | Type II restriction enzyme, methylase subunit                                      |
| mic3127        |                | SAM-dependent methyltransferase                                                              | mic6600        | COG0270        | Site-specific DNA methylase (putative <i>HhaI</i> modification methylase)          |
| mic3146        | COG0863        | DNA modification methylase (cytosine methylase)                                              | mic7256        | COG0286        | Type I restriction-modification system methyltransferase subunit                   |

Enzymes shown in bold are co-localized with putative methylases shown in the table of additional file 6.
