# Supplementary material for: Highly plastic genome of Microcystis aeruginosa PCC 7806, a ubiquitous toxic freshwater cyanobacterium
Source: PubMed Central journal article supplement (PMC2442094; doi:10.1186/1471-2164-9-274), 2008-06-05
Supplement: 1471-2164-9-274-S8.pdf [file 1471-2164-9-274-S8.pdf]

**Additional file 8**

**Characteristics of the 1% of the rare 6-mers in the genome of *Microcystis aeruginosa* PCC 7806**

| 6-mers | occurrence | Palindrome | Enzyme         | Organism            | 6-mers | occurrence | Palindrome | Enzyme        | Organism             |
|--------|------------|------------|----------------|---------------------|--------|------------|------------|---------------|----------------------|
| ACATGC | 15         | no         |                |                     | GCATGC | 39         | yes        | <i>SphI</i>   | <i>Streptomyces</i>  |
| GTGCAC | 17         | yes        | <i>ApaLI</i>   | <i>Acetobacter</i>  | TACGTG | 44         | no         |               |                      |
| CGTACG | 18         | yes        | <i>BsiW</i>    | <i>Bacillus</i>     | ATGCAT | 45         | yes        | <i>AvaIII</i> | <i>Anabaena</i>      |
| ACATGT | 18         | yes        | <i>PciI</i>    | <i>Planococcus</i>  | GTGCCC | 45         | no         |               |                      |
| GCAATG | 21         | no         |                |                     | GAGCAC | 47         | no         |               |                      |
| GACGTC | 23         | yes        | <i>AatII</i>   | <i>Acetobacter</i>  | GTCTAC | 50         | no         |               |                      |
| ACGTGT | 28         | no         |                |                     | TTCGAA | 55         | yes        | <i>BstBI</i>  | <i>Bacillus</i>      |
| GTCGAC | 30         | yes        | <i>Sall</i>    | <i>Streptomyces</i> | GGGCTC | 58         | no         |               |                      |
| CACGTG | 30         | yes        | <i>PmiI</i>    | <i>Pseudomonas</i>  | GAGCCC | 61         | no         |               |                      |
| ACACGT | 31         | no         |                |                     | TGCGCA | 64         | yes        | <i>FspI</i>   | <i>Fischerella</i>   |
| GGGCAC | 31         | no         |                |                     | GGTACC | 93         | yes        | <i>Acc65I</i> | <i>Acinetobacter</i> |
| TACGTA | 32         | yes        | <i>SnaBI</i>   | <i>Sphaerotilus</i> | AGTACT | 96         | yes        | <i>Scal</i>   | <i>Streptomyces</i>  |
| GCTAGC | 33         | yes        | <i>BmtI</i>    | <i>Bacillus</i>     | CATATG | 97         | yes        | <i>NdeI</i>   | <i>Neisseria</i>     |
| CACGTA | 34         | no         |                |                     | ACGCGT | 98         | yes        | <i>MluI</i>   | <i>Micrococcus</i>   |
| GTGCTC | 35         | no         |                |                     | CTCGAG | 122        | yes        | <i>AvaI</i>   | <i>Anabaena</i>      |
| GTAGAC | 36         | no         |                |                     | CGCGCG | 129        | yes        | none          |                      |
| GTATAC | 36         | yes        | <i>BstZ17I</i> | <i>Bacillus</i>     | CATACG | 133        | no         |               |                      |
| GAGCTC | 37         | yes        | <i>SacI</i>    | <i>Streptomyces</i> | CGTATG | 136        | no         |               |                      |
| ACTAGT | 38         | yes        | <i>SpeI</i>    | <i>Sphaerotilus</i> | GGACCT | 147        | no         |               |                      |
| GGCGTC | 38         | no         |                |                     | CAGCTC | 148        | no         |               |                      |
| GACGCC | 38         | no         |                |                     |        |            |            |               |                      |

Of the 4096 possible 6-mers, 1.5% are palindromic sequences. These sequences seem to be over-represented among the 41 rarest 6-mers in the Mic-PCC7806 genome since 51% of these 6-mers are palindromes. Most of the palindromic sequences correspond to known
