# Supplementary material for: Highly plastic genome of Microcystis aeruginosa PCC 7806, a ubiquitous toxic freshwater cyanobacterium
Source: PubMed Central journal article supplement (PMC2442094; doi:10.1186/1471-2164-9-274), 2008-06-05
Supplement: 1471-2164-9-274-S10.pdf [file 1471-2164-9-274-S10.pdf]

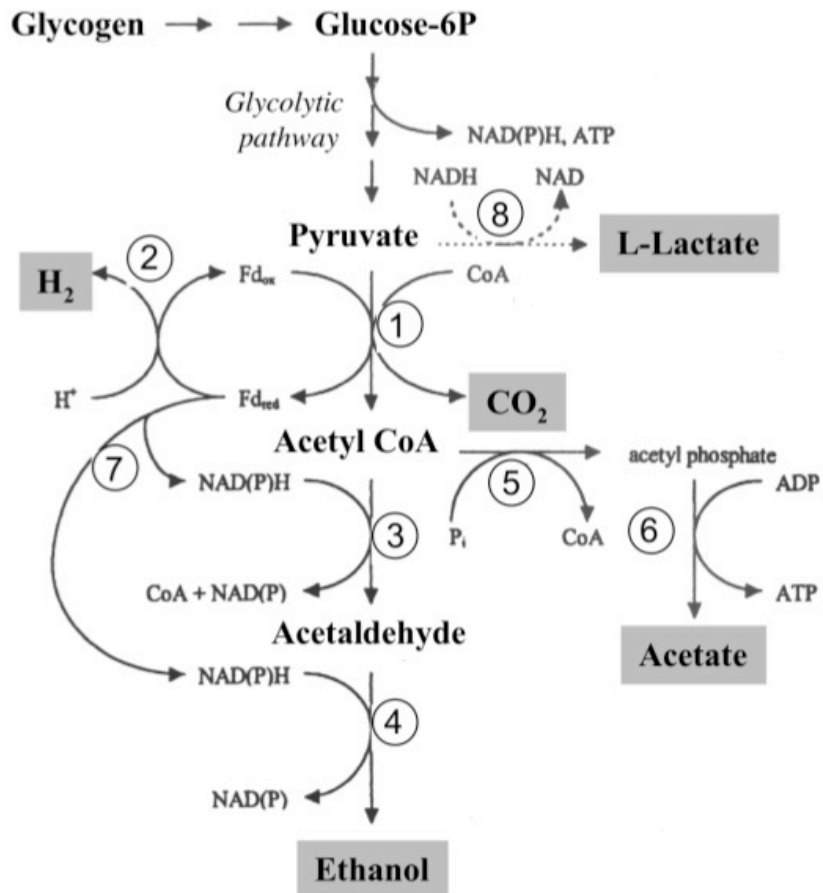

- 1: CoA-linked pyruvate:Fd oxidoreductase (EC: 1.2.7.1; *mic4303*)
- 2: Hydrogenase (EC: 1.18.99.1; *mic1925*)
- 3: CoA-linked aldehyde dehydrogenase (EC: 1.2.1.10; *mic0903*)
- 4: Alcohol dehydrogenase (EC: 1.1.1.2; *mic4903*)
- 5: Phosphotransacetylase (EC: 2.3.1.8; *mic3973*)
- 6: Acetate kinase (EC: 2.7.2.1; *mic5140*)
- 7: Fd:NADP oxidoreductase (EC: 1.18.1.2; *mic5476*)
- 8: NAD-dependent lactate dehydrogenase (EC: 1.1.1.27; *mic4831*)

**Additional file 10:** Fermentation pathway adapted from Moezelaar and Stal (1997). Enzyme and gene identifiers for *Microcystis aeruginosa* PCC 7806 are indicated in parentheses. Moezelaar R, Stal LJ: **A comparison of fermentation in the cyanobacterium *Microcystis* PCC 7806 grown under a light/dark cycle and continuous light.** *Eur J Phycol* 1997, **32**:373-378.
