# Supplementary material for: Highly plastic genome of Microcystis aeruginosa PCC 7806, a ubiquitous toxic freshwater cyanobacterium
Source: PubMed Central journal article supplement (PMC2442094; doi:10.1186/1471-2164-9-274), 2008-06-05
Supplement: 1471-2164-9-274-S11.pdf [file 1471-2164-9-274-S11.pdf]

**Additional file 11****Circadian clock system in *Microcystis aeruginosa* PCC 7806**

| Gene identifier | Gene name (a) | Putative gene product                                 |
|-----------------|---------------|-------------------------------------------------------|
| <i>mic0439</i>  | <i>kaiA</i>   | Circadian clock protein KaiA homolog                  |
| <i>mic0440</i>  | <i>kaiB1</i>  | Circadian clock protein KaiB homolog                  |
| <i>mic0441</i>  | <i>kaiC1</i>  | Circadian clock protein KaiC homolog                  |
| <i>mic2007</i>  | <i>kaiB2</i>  | Circadian clock protein KaiB homolog                  |
| <i>mic4842</i>  | <i>kaiB3</i>  | Circadian clock protein KaiB homolog                  |
| <i>mic2046</i>  | <i>kaiC2</i>  | Circadian clock protein KaiC homolog                  |
| <i>mic2820</i>  | <i>cikA</i>   | Circadian input kinase CikA                           |
| <i>mic3962</i>  | <i>sasA</i>   | Adaptive-response sensory histidine kinase SasA       |
| <i>mic1620</i>  | <i>rpaA</i>   | DNA binding response regulator RpaA                   |
| <i>mic1745</i>  | <i>labA</i>   | Negative regulator for circadian gene expression LabA |
| <i>mic5879</i>  | <i>ldpA</i>   | Circadian period regulator LdpA                       |
| <i>mic0802</i>  | <i>cpmA</i>   | Circadian phase modifier CpmA                         |

(a) Mackey SR and Golden SS: **Winding up the cyanobacterial circadian clock.** *Trends Microbiol* 2007, **15**:381-388.
