# Supplementary material for: Highly plastic genome of Microcystis aeruginosa PCC 7806, a ubiquitous toxic freshwater cyanobacterium
Source: PubMed Central journal article supplement (PMC2442094; doi:10.1186/1471-2164-9-274), 2008-06-05
Supplement: 1471-2164-9-274-S13.pdf [file 1471-2164-9-274-S13.pdf]

**Additional file 13****Methionine salvage pathway in *Microcystis aeruginosa* PCC 7806**

| Gene identifier | Gene name (a) | EC number      | Putative gene product                                         |
|-----------------|---------------|----------------|---------------------------------------------------------------|
| <i>mic1437</i>  | <i>metK</i>   | EC: 2.5.1.6    | S-adenosylmethionine synthetase                               |
| <i>mic8798</i>  | <i>speD</i>   | EC: 4.1.50     | S-adenosylmethionine decarboxylase                            |
| <i>mic3610</i>  | <i>speE</i>   | EC: 2.5.1.16   | spermidine synthase                                           |
| <i>mic6534</i>  | <i>mtnP</i>   | EC: 2.4.2.28   | 5'-methylthioadenosine phosphorylase                          |
| <i>mic4478</i>  | <i>mtnA</i>   | EC: 5.3.1.23   | methylthioribose-1-phosphate isomerase                        |
| <i>mic1285</i>  | <i>mtnB</i>   | EC: 4.2.1.109  | methylthioribulose-1-phosphate dehydratase                    |
| <i>mic2991</i>  | <i>mtnW</i>   | EC: 3.1.3.77   | 2,3-diketo-5-methylthiopentyl-1-phosphate enolase             |
| <i>mic2099</i>  | <i>mtnX</i>   | EC: 3.1.3.77   | 2-hydroxy-3-keto-5-methylthiopentenyl-1-phosphate phosphatase |
| <i>mic3733</i>  | <i>mtnZ</i>   | EC: 1.13.11.54 | 1,2-dihydroxy-3-keto-5-methylthiopentene dioxygenase          |
| <i>mic4336</i>  | <i>mtnE</i>   | EC: 2.6.1.-    | 2-keto-4-methylthiobutyrate transferase                       |

(a) Sekowska A, Dénervaud V, Ashida H, Michoud K, Hass D, Yokota A, Danchin A: **Bacterial variations on the methionine salvage pathway**. *BMC Microbiol* 2004, **4**:1-17
